# Supplementary material for: Quantitative HPLC-MS analysis of nucleotide sugars in plant cells following off-line SPE sample preparation
Source: PubMed Central journal article supplement (PMC3992224; doi:10.1007/s00216-014-7746-3), 2014-03-18
Supplement: 216_2014_7746_MOESM1_ESM.pdf [file 216_2014_7746_MOESM1_ESM.pdf]

Analytical and Bioanalytical Chemistry

Electronic Supplementary Material

**Quantitative HPLC-MS analysis of nucleotide sugars in plant cells following off-line SPE sample preparation**

Robert Behmüller, Ines C. Forstenlehner, Raimund Tenhaken, Christian G. Huber

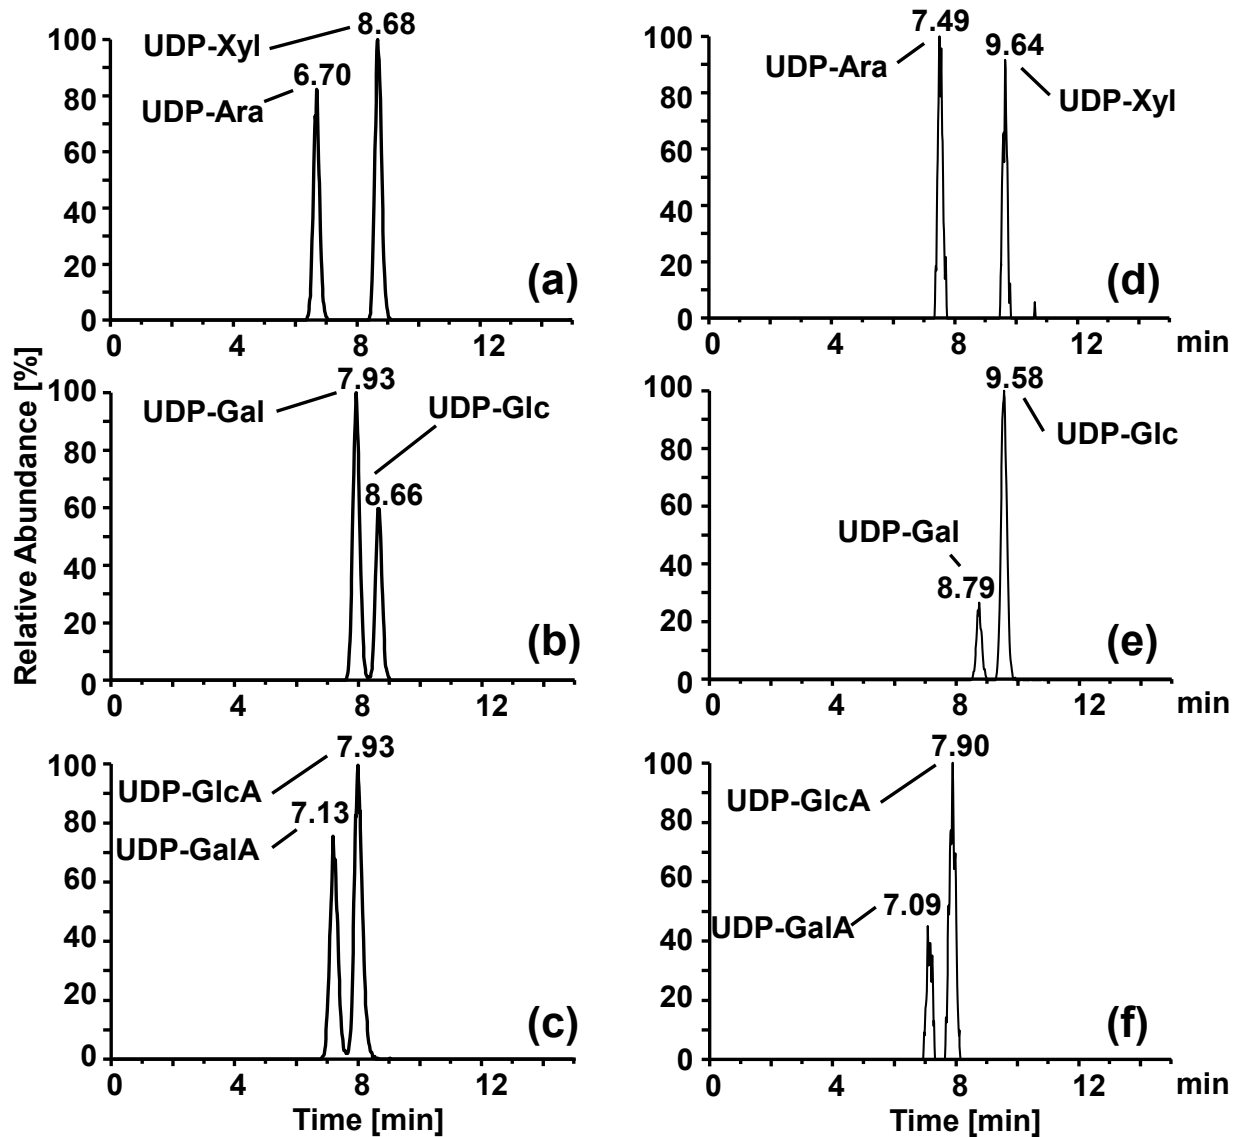

**Fig. S1.** Extracted ion current chromatograms (EICC) of UDP-Xyl and UDP-Ara ( $m/z$  535.0371) (a), UDP-Gal and UDP-Glc ( $m/z$  565.0477) (b), and UDP-GalA and UDP-GlcA ( $m/z$  579.0270) (c). Chromatographic and column regeneration conditions are given in the materials and methods section. EICCs were extracted with a  $\pm 10$  ppm mass window., sample, UDP-sugar standards (a-c) and UDP-sugars extracted from wild type Arabidopsis plants (d-f)

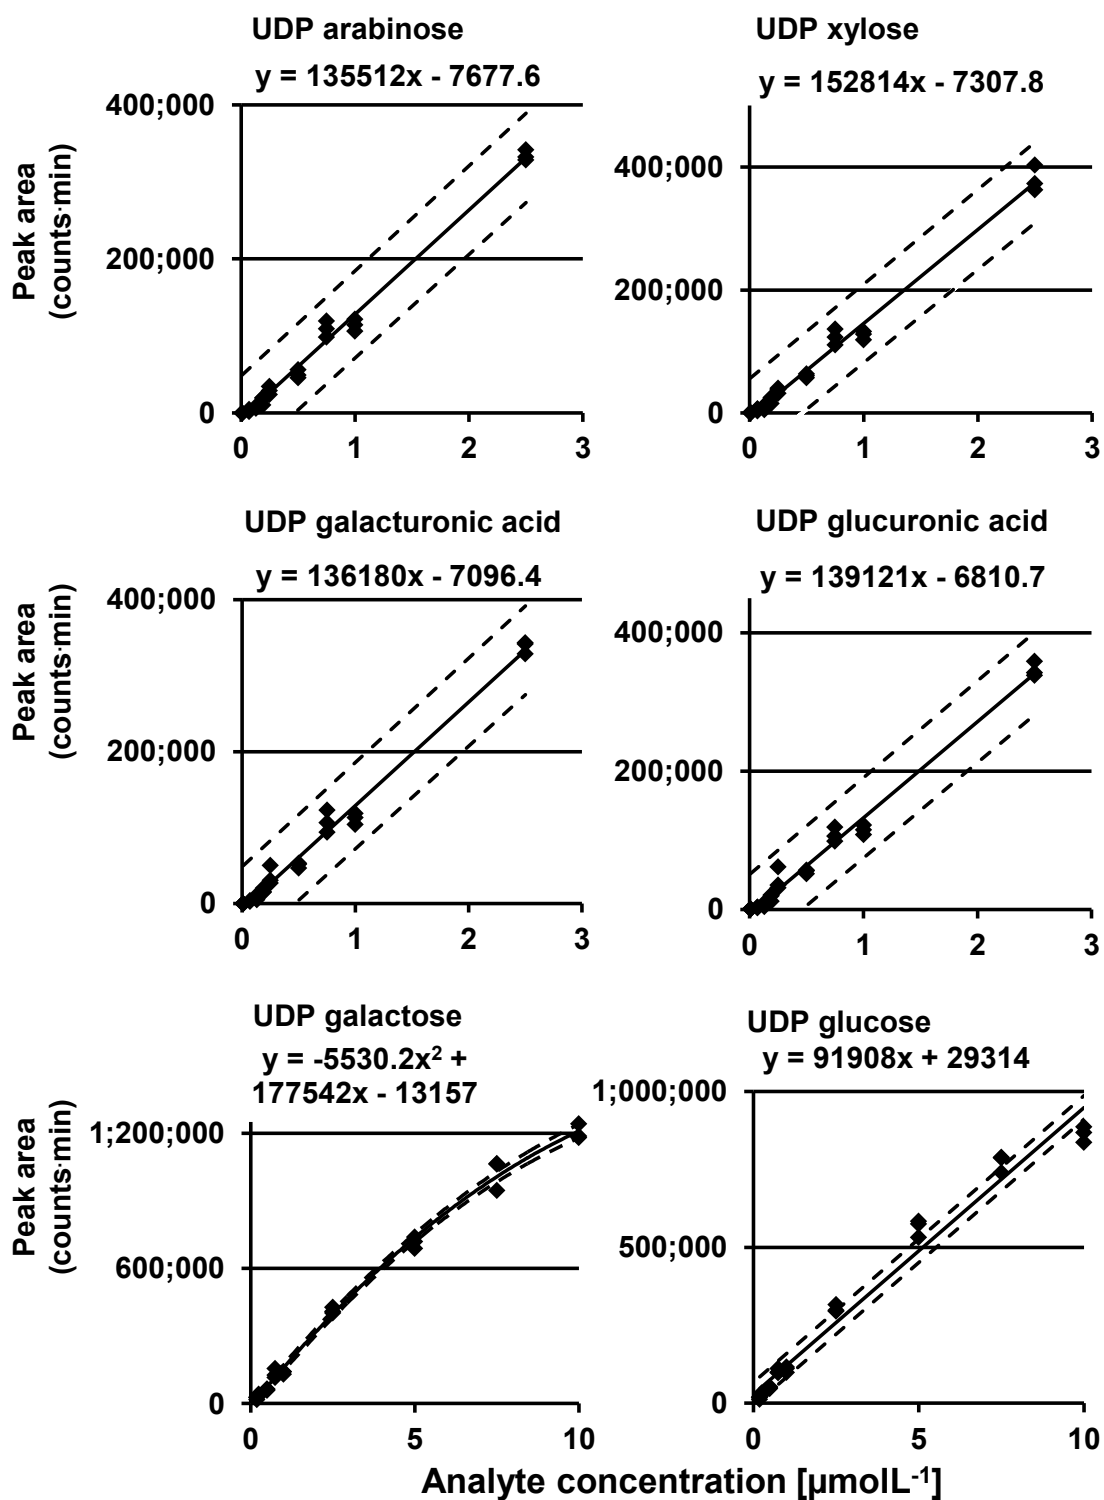

Fig. S2 Calibration graphs of six UDP-sugars. Parameters of the regression functions are given in Table 1

**Table S1.** Concentration of each UDP sugar and its confidence interval for each biological replicate<sup>a)</sup>

| Wild type  | Amount in $\mu\text{g g}^{-1}$<br>fresh weight <sup>a)</sup> | C.I. in $\mu\text{g g}^{-1}$<br>fresh weight <sup>a)</sup> | <i>ugd2,3</i> mutant | Amount in $\mu\text{g g}^{-1}$<br>fresh weight <sup>a)</sup> | C.I. in $\mu\text{g g}^{-1}$<br>fresh weight <sup>a)</sup> |
|------------|--------------------------------------------------------------|------------------------------------------------------------|----------------------|--------------------------------------------------------------|------------------------------------------------------------|
| UDP-Ara 1  | 0.84                                                         | 0.28                                                       | UDP-Ara 1            | 0.44                                                         | 0.28                                                       |
| UDP-Ara 2  | 0.76                                                         | 0.28                                                       | UDP-Ara 2            | 0.60                                                         | 0.28                                                       |
| UDP-Ara 3  | 0.60                                                         | 0.28                                                       | UDP-Ara 3            | 0.46                                                         | 0.28                                                       |
| UDP-Ara 4  | 1.14                                                         | 0.28                                                       | UDP-Ara 4            | 0.56                                                         | 0.28                                                       |
| UDP-Xyl 1  | 0.65                                                         | 0.31                                                       | UDP-Xyl 1            | 0.38                                                         | 0.31                                                       |
| UDP-Xyl 2  | 0.65                                                         | 0.31                                                       | UDP-Xyl 2            | 0.52                                                         | 0.31                                                       |
| UDP-Xyl 3  | 0.47                                                         | 0.31                                                       | UDP-Xyl 3            | 0.38                                                         | 0.31                                                       |
| UDP-Xyl 4  | 0.96                                                         | 0.31                                                       | UDP-Xyl 4            | 0.42                                                         | 0.31                                                       |
| UDP-Gal 1  | 3.22                                                         | 0.71                                                       | UDP-Gal 1            | 5.49                                                         | 0.75                                                       |
| UDP-Gal 2  | 3.58                                                         | 0.72                                                       | UDP-Gal 2            | 5.88                                                         | 0.76                                                       |
| UDP-Gal 3  | 2.79                                                         | 0.70                                                       | UDP-Gal 3            | 5.20                                                         | 0.75                                                       |
| UDP-Gal 4  | 5.47                                                         | 0.75                                                       | UDP-Gal 4            | 6.50                                                         | 0.78                                                       |
| UDP-Glc 1  | 22.69                                                        | 2.24                                                       | UDP-Glc 1            | 32.24                                                        | 2.30                                                       |
| UDP-Glc 2  | 26.22                                                        | 2.25                                                       | UDP-Glc 2            | 36.27                                                        | 2.37                                                       |
| UDP-Glc 3  | 19.35                                                        | 2.23                                                       | UDP-Glc 3            | 33.03                                                        | 2.31                                                       |
| UDP-Glc 4  | 37.79                                                        | 2.40                                                       | UDP-Glc 4            | 38.52                                                        | 2.42                                                       |
| UDP-GalA 1 | 0.64                                                         | 0.34                                                       | UDP-GalA 1           | 0.32                                                         | 0.34                                                       |
| UDP-GalA 2 | 0.58                                                         | 0.34                                                       | UDP-GalA 2           | 0.46                                                         | 0.34                                                       |
| UDP-GalA 3 | 0.41                                                         | 0.34                                                       | UDP-GalA 3           | 0.41                                                         | 0.34                                                       |
| UDP-GalA 4 | 0.75                                                         | 0.34                                                       | UDP-GalA 4           | 0.41                                                         | 0.34                                                       |
| UDP-GlcA 1 | 1.40                                                         | 0.35                                                       | UDP-GlcA 1           | 0.50                                                         | 0.35                                                       |
| UDP-GlcA 2 | 1.21                                                         | 0.35                                                       | UDP-GlcA 2           | 0.56                                                         | 0.35                                                       |
| UDP-GlcA 3 | 0.96                                                         | 0.35                                                       | UDP-GlcA 3           | 0.47                                                         | 0.35                                                       |
| UDP-GlcA 4 | 2.03                                                         | 0.35                                                       | UDP-GlcA 4           | 0.55                                                         | 0.35                                                       |

<sup>a)</sup>Average concentrations and confidence intervals (N=3, P=95%) were calculated from triplicate measurements.

**Table S2.** Single factor ANOVA analysis results<sup>a)</sup>

| SUMMARY for UDP arabinose |               |                |                |                 | SUMMARY for UDP glucose           |               |                |                |                 |
|---------------------------|---------------|----------------|----------------|-----------------|-----------------------------------|---------------|----------------|----------------|-----------------|
| <i>Groups</i>             | <i>Count</i>  | <i>Sum</i>     | <i>Average</i> | <i>Variance</i> | <i>Groups</i>                     | <i>Count</i>  | <i>Sum</i>     | <i>Average</i> | <i>Variance</i> |
| UDP-Ara WT                | 4             | 3.34           | 0.83           | 0.05            | UDP-Glc WT                        | 4             | 106.04         | 26.51          | 64.43           |
| UDP-Ara <i>ugd2,3</i>     | 4             | 2.05           | 0.51           | 0.01            | UDP-Glc <i>ugd2,3</i>             | 4             | 140.05         | 35.01          | 8.51            |
| ANOVA                     |               |                |                |                 | ANOVA                             |               |                |                |                 |
| <i>F</i>                  | <i>F crit</i> | <i>P-value</i> |                |                 | <i>F</i>                          | <i>F crit</i> | <i>P-value</i> |                |                 |
| 7.29                      | 5.99          | 0.04           |                |                 | 3.96                              | 5.99          | 0.09           |                |                 |
| SUMMARY for UDP xylose    |               |                |                |                 | SUMMARY for UDP galacturonic acid |               |                |                |                 |
| <i>Groups</i>             | <i>Count</i>  | <i>Sum</i>     | <i>Average</i> | <i>Variance</i> | <i>Groups</i>                     | <i>Count</i>  | <i>Sum</i>     | <i>Average</i> | <i>Variance</i> |
| UDP-Xyl WT                | 4             | 2.73           | 0.68           | 0.04            | UDP-GalA WT                       | 4             | 2.20           | 0.55           | 0.02            |
| UDP-Xyl <i>ugd2,3</i>     | 4             | 1.69           | 0.42           | 0.00            | UDP-GalA <i>ugd2,3</i>            | 4             | 1.48           | 0.37           | 0.00            |
| ANOVA                     |               |                |                |                 | ANOVA                             |               |                |                |                 |
| <i>F</i>                  | <i>F crit</i> | <i>P-value</i> |                |                 | <i>F</i>                          | <i>F crit</i> | <i>P-value</i> |                |                 |
| 5.83                      | 5.99          | 0.05           |                |                 | 6.42                              | 5.99          | 0.04           |                |                 |
| SUMMARY for UDP galactose |               |                |                |                 | SUMMARY for UDP glucuronic acid   |               |                |                |                 |
| <i>Groups</i>             | <i>Count</i>  | <i>Sum</i>     | <i>Average</i> | <i>Variance</i> | <i>Groups</i>                     | <i>Count</i>  | <i>Sum</i>     | <i>Average</i> | <i>Variance</i> |
| UDP-Gal WT                | 4             | 15.07          | 3.77           | 1.40            | UDP-GlcA WT                       | 4             | 5.17           | 1.29           | 0.18            |
| UDP-Gal <i>ugd2,3</i>     | 4             | 23.08          | 5.77           | 0.32            | UDP-GlcA <i>ugd2,3</i>            | 4             | 1.93           | 0.48           | 0.00            |
| ANOVA                     |               |                |                |                 | ANOVA                             |               |                |                |                 |
| <i>F</i>                  | <i>F crit</i> | <i>P-value</i> |                |                 | <i>F</i>                          | <i>F crit</i> | <i>P-value</i> |                |                 |
| 9.35                      | 5.99          | 0.02           |                |                 | 14.62                             | 5.99          | 0.01           |                |                 |

<sup>a)</sup> Wild type and *ugd2,3* data for each UDP sugar were compared for the four biological replicates via ANOVA analysis. The ANOVA analysis was performed by means of Microsoft Excel using an alpha value of 0.05. The F values are highlighted in red.
